# Supplementary material
Source: Royal Society of Chemistry journal article supplement (doi:10.1039/d6mh00635c)
Supplement: d6mh00635c1.pdf [file d6mh00635c1.pdf]

1 **Supplementary Materials for “A Triply Periodic Minimal Surfaces-based**  
2 **acoustic crystal with double-zero index”**

3 Yafeng Chen<sup>1#,‡</sup>, Shanjun Liang<sup>2#</sup>, Zhihao Lan<sup>3,6</sup>, Zhongming Gu<sup>1</sup>, Zhongqing Su<sup>4\*</sup>, Jie  
4 Zhu<sup>1,5‡</sup>

5 *<sup>1</sup>Institute of Acoustics, School of Physics Science and Engineering, Tongji University, 200092*  
6 *Shanghai, China*

7 *<sup>2</sup>Division of Science, Engineering and Health Studies, College of Professional and*  
8 *Continuing Education, Hong Kong Polytechnic University, Hong Kong SAR, China*

9 *<sup>3</sup>Department of Electronic and Electrical Engineering, University College London, London*  
10 *WC1E 7JE, United Kingdom*

11 *<sup>4</sup>Department of Mechanical Engineering, The Hong Kong Polytechnic University, Kowloon,*  
12 *Hong Kong SAR, China*

13 *<sup>5</sup>Shanghai Research Institute for Intelligent Autonomous Systems, Tongji University,*  
14 *Shanghai 201210, China*

15 *<sup>6</sup>College of Physical Sciences and Engineering, Mohammed VI Polytechnic University, 43150,*  
16 *Ben Guerir, Morocco*

17  
18 **1. The parameter setting in TPMS Designer**

19 Figure S1 shows the parameter setting in TPMS Designer for generating the unit cell in the  
20 main text.

---

<sup>#</sup>These authors contribute equally to this work.

<sup>‡</sup>jiezhu@tongji.edu.cn

<sup>\*</sup>zhongqing.su@polyu.edu.hk

<sup>‡</sup>yachen@tongji.edu.cn

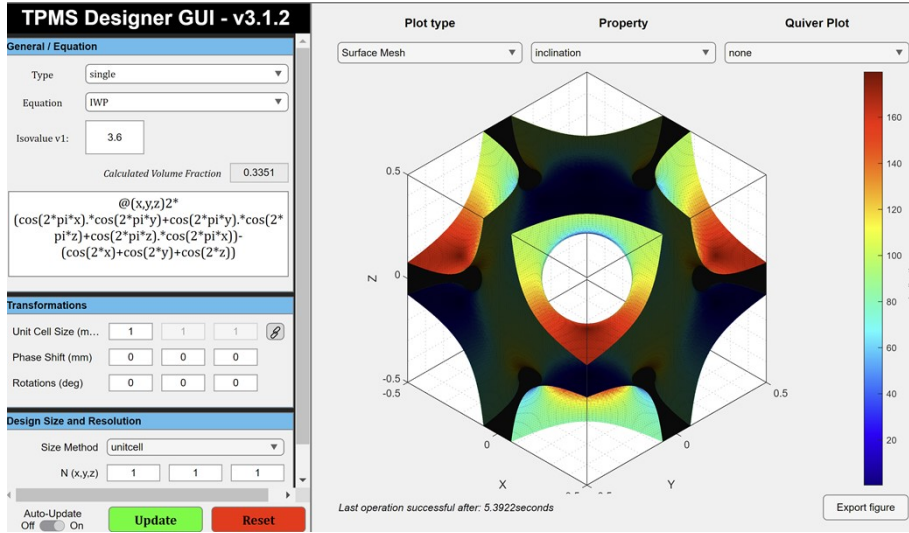

21

22

**Fig. S1.** The parameter setting in TPMS Designer.

23

24 **2. The conical dispersions in the  $k_x-k_z$  and  $k_y-k_z$  planes near the Dirac-like cone**

25 The conical dispersions in the  $k_y-k_z$  and  $k_x-k_z$  planes near the Dirac-like cone are shown in **Fig.**

26 **S1**, showing a conical dispersion intersected by two flat bands.

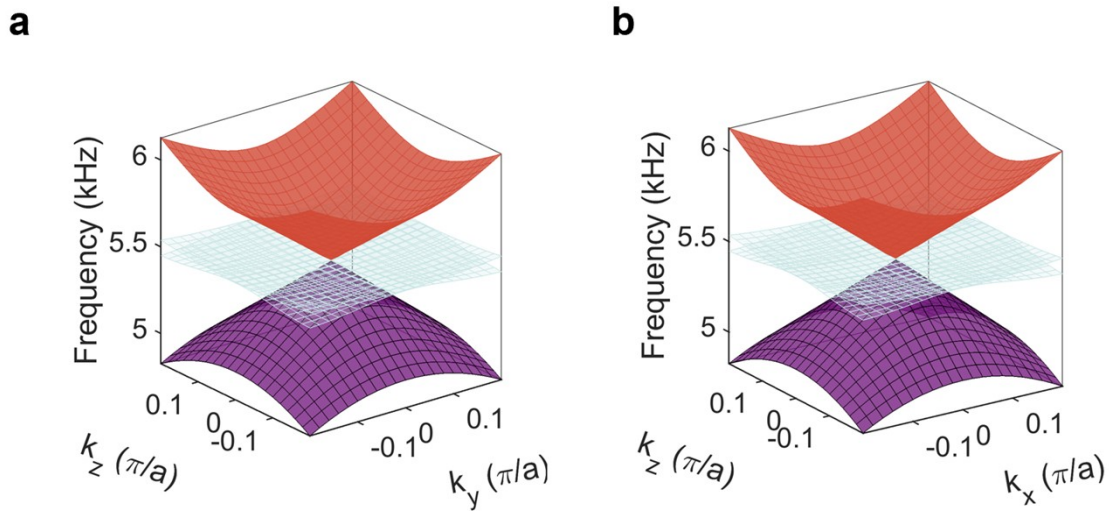

27

28 **Fig. S2.** The conical dispersions in the  $k_x-k_z$  and  $k_y-k_z$  planes near the Dirac-like cone. **a**

29

In the  $k_x-k_z$  plane. **b** In the  $k_y-k_z$  plane.

30

31 **3. The effect of thermoviscous boundary layer effects**

32 Without loss of generality, when the lattice constant is 50 mm, as adopted in this study, the

33 corresponding operating frequency is around 5500 Hz. According to acoustic theory, the  
34 effective thermal-viscous boundary layer thickness is

$$35 \quad d_{vis} = 2.28 \sqrt{\frac{2\mu}{2\pi f \rho_0}},$$

36 where  $\mu$  is the dynamic viscosity ( $1.81 \times 10^{-5}$  Pa/s for air at 20 °C and 1atm),  $f$  is the operating  
37 frequency, and  $\rho_0 = 1.2$  kg/m<sup>3</sup> is the air density under same condition. In this case,  $d_{vis}$  is  
38 0.071 mm, which is much smaller than the characteristic dimension of the hollow regions.

39

40 We further verified the wavefront modulation performance of the designed TPMS structure  
41 under lossy conditions through numerical simulations. As shown in Fig. S3, the outgoing  
42 wave exhibits high spatial uniformity and agrees well with its lossless counterpart (see the  
43 Fig. 2a in main manuscript). Therefore, the effects of thermal and viscous losses are  
44 negligible, as the unit cell dimensions are much larger than the thickness of the viscous  
45 boundary layer at the frequencies considered.

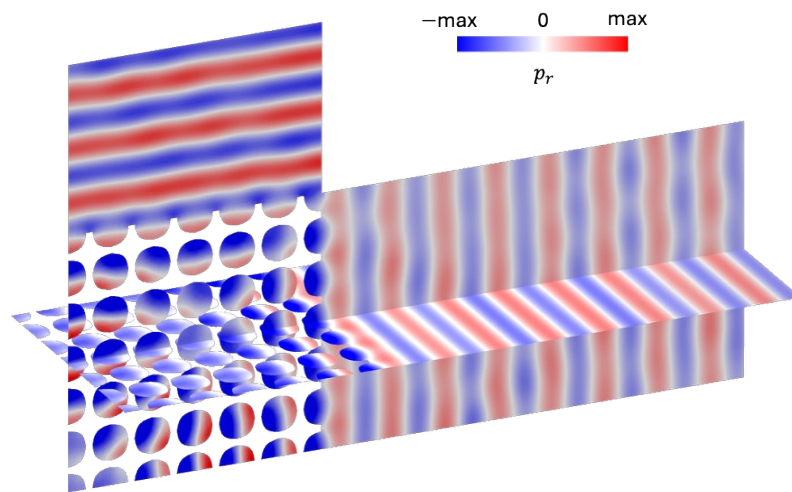

46

47 **Fig. S3.** The wavefront modulation simulation with the consideration of thermoviscous  
48 boundary layer effects.

49

#### 50 **4. The numerical simulation of compression test**

51 We use the Solid Mechanics module in COMSOL Multiphysic to conduct the compression  
52 simulation. In the simulation, the material's mechanical properties are the same as those of  
53 the 3D-printed specimen in the compression experiment, where the Young's modulus is 61  
54 MPa, the density is 1120 kg/m<sup>3</sup>, and the Poisson's ratio is 0.45. The simulated strain-stress  
55 curve is shown in Fig. 4b in the main text, which agrees well with the experimental results.
